# Supplementary material for: Care coordination for children with special health care needs: a cohort study
Source: Springer Nature journal article supplement (doi:10.1186/s13052-017-0342-3), 2017-02-03
Supplement: MOESM1 [file 12114036]

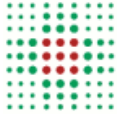

## Progetto SpeNK

“Il neonato e il bambino ad alta complessità assistenziale. L'implementazione e la valutazione delle dimissioni protette e dei percorsi integrati ospedale-territorio nella provincia di Bologna”

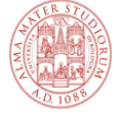

# SCHEDA PER L'ATTIVITÀ DI COORDINAMENTO DEL PLS

(Adattamento del *Medical Home Care Coordination Measurement Tool*® sviluppato da Antonelli et al., 2008)

## SCHEDA ANAGRAFICA

Cognome: \_\_\_\_\_ (campo obbligatorio)

Nome: \_\_\_\_\_ (campo obbligatorio)

Data di nascita: |\_\_|\_\_|\_\_|/|\_\_|\_\_|\_\_|/|\_\_|\_\_|\_\_|\_\_| (campo obbligatorio)

Cod. Fiscale: |\_\_|\_\_|\_\_| |\_\_|\_\_|\_\_| |\_\_|\_\_|\_\_|\_\_|\_\_| |\_\_|\_\_|\_\_|\_\_|\_\_| (campo obbligatorio)

Cod. Esenzione: |\_\_|\_\_|\_\_| |\_\_|\_\_|\_\_|\_\_|\_\_|\_\_|  
(Cod. ICD-9-CM)

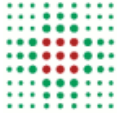

## Progetto SpeNK

“Il neonato e il bambino ad alta complessità assistenziale. L'implementazione e la valutazione delle dimissioni protette e dei percorsi integrati ospedale-territorio nella provincia di Bologna”

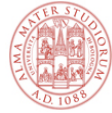

(tutti i campi sono *obbligatorii*)

### SCHEDA CONTATTO

Data contatto: |\_\_|\_\_|/|\_\_|\_\_|/|\_\_|\_\_|\_\_|\_\_| (campo obbligatorio)

### LIVELLO COMPLESSITÀ DEL PAZIENTE

**Definire, sulla base dei dati clinici in proprio possesso, il livello di complessità assistenziale del proprio assistito (indicare SOLO UNO):**

- Bambini senza particolari bisogni di assistenza sanitaria, con questioni familiari o problemi sociali complicanti
- Bambini con particolari bisogni di assistenza sanitaria, senza questioni familiari o problemi sociali complicanti
- Bambini con particolari bisogni di assistenza sanitaria, con questioni familiari o problemi sociali complicanti

### MOTIVO DEL CONTATTO

**Specificare per quale delle seguenti problematiche/richieste del paziente è avvenuto il contatto (possibilità di scelta multipla):**

- Richiesta visita al PLS
- Prescrizione farmaci
- Prescrizione esami strumentali
- Prescrizione esami di laboratorio
- Necessità protesi/ausili
- Crescita/nutrizione
- Invio ad uno specialista
- Sviluppo psicomotorio/comportamento
- Educazione/scolarizzazione
- Ritardo mentale
- Servizi sociali (*alloggio, alimentazione, abbigliamento, assicurazione, trasporti*)
- Richiesta ADI
- Questioni legali/giudiziarie
- Altro



## Progetto SpeNK

“Il neonato e il bambino ad alta complessità assistenziale. L'implementazione e la valutazione delle dimissioni protette e dei percorsi integrati ospedale-territorio nella provincia di Bologna”



### BISOGNI CHE RICHIEDONO ATTIVITÀ DI COORDINAMENTO

**Indicare quali dei seguenti bisogni del paziente, emersi durante il contatto, richiedono attività di assistenza coordinata (possibilità di scelta multipla):**

- Valutare ulteriori rinvii specialistici
- Richiedere farmaci
- Richiedere attrezzature sanitarie
- Richiedere servizi
- Richiedere esami strumentali
- Richiedere esami di laboratorio
- Servizi di coordinazione (*scuole, associazioni, assicurazione*)
- Risoluzione incomprensioni e mancate comunicazioni
- Nessuno

### ATTIVITÀ MESSE IN PRATICA

**Specificare le attività da mettere in pratica per soddisfare i bisogni del paziente emersi durante il contatto (possibilità di scelta multipla):**

- Contatti con genitori/famiglia (Se “SI”, marcare una modalità)
  - Telefono
  - Incontri
  - Lettera
  - E-mail
  - Fax
- Contatti con scuola (Se “SI”, marcare una modalità)
  - Telefono
  - Incontri
  - Lettera
  - E-mail
  - Fax
- Contatti con Servizi socio-sanitari (Pediatria di Comunità, Servizi Sociali, ...) (Se “SI”, marcare una modalità)
  - Telefono
  - Incontri
  - Lettera
  - E-mail
  - Fax
- Contatti con ospedale/clinica (Se “SI”, marcare una modalità)
  - Telefono
  - Incontri
  - Lettera
  - E-mail
  - Fax
- Contatti con assicurazione (Se “SI”, marcare una modalità)
  - Telefono
  - Incontri
  - Lettera
  - E-mail
  - Fax
- Contatti con educatore professionale (Se “SI”, marcare una modalità)
  - Telefono
  - Incontri
  - Lettera
  - E-mail
  - Fax
- Contatti con farmacia (Se “SI”, marcare una modalità)
  - Telefono
  - Incontri
  - Lettera
  - E-mail
  - Fax



## Progetto SpeNK

“Il neonato e il bambino ad alta complessità assistenziale. L'implementazione e la valutazione delle dimissioni protette e dei percorsi integrati ospedale-territorio nella provincia di Bologna”



Contatti con associazioni (Se “SI”, marcare una modalità)

Telefono  Incontri  Lettera  E-mail  Fax

Contatti con personale dell'ADI (Se “SI”, marcare una modalità)

Telefono  Incontri  Lettera  E-mail  Fax

Contatti con specialisti (Se “SI”, marcare una modalità)

Telefono  Incontri  Lettera  E-mail  Fax

Contatti con altra figura (Se “SI”, marcare una modalità)

Telefono  Incontri  Lettera  E-mail  Fax

Comunicazioni scritte (Se “SI”, marcare una modalità)

- Rilascio certificati/moduli per scuole e tempo libero
- Rilascio referti/risultati indagini di laboratorio e strumentali
- Nessuna

Notifiche/relazioni alle Autorità sanitarie (notifica malattie infettive, ...)

Revisione/aggiornamento documentazione paziente

Audit clinico

Sviluppare/modificare il piano di assistenza individuale (PAI)

Incontri/conferenze sul caso

## STAFF COINVOLTO NELL'ATTIVITÀ DI COORDINAMENTO

***Nella programmazione delle attività di coordinamento specificare quali figure professionali del tuo staff sono coinvolte(possibilità di scelta multipla):***

- Nessuno
- Altri medici
- Infermieri professionali
- Operatori sociali
- Personale amministrativo
- Altro

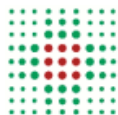

## Progetto SpeNK

“Il neonato e il bambino ad alta complessità assistenziale. L'implementazione e la valutazione delle dimissioni protette e dei percorsi integrati ospedale-territorio nella provincia di Bologna”

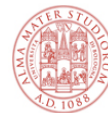

### TEMPO DEDICATO ALLE ATTIVITÀ DI COORDINAMENTO

**Quantifica il tempo dedicato alla risoluzione del problema e alle conseguenti attività di coordinamento necessarie(indicane SOLO UNO):**

- Meno di 5 minuti
- Da 5 a 9 minuti
- Da 10 a 19 minuti
- Da 20 a 29 minuti
- Da 30 a 39 minuti
- Da 40 a 49 minuti
- = o >50 minuti (prego annotare i minuti effettivi, se il tempo è >50') |\_\_|\_\_|\_\_|minuti

### ESITI DELL'ATTIVITÀ DI COORDINAMENTO

**Grazie alla presente valutazione, secondo la tua opinione, non è stato necessario per il paziente il ricorso a: (possibilità di scelta multipla):**

- Visita al Pronto Soccorso
- Ulteriore visita specialistica
- Ospedalizzazione
- Visita alla clinica pediatrica
- Indagini di laboratorio/indagini strumentali
- Farmaci
- Altro (*specificare*) \_\_\_\_\_

**Come risultato del presente contatto, si è verificato il seguente esito (possibilità di scelta multipla):**

- Aver consigliato la famiglia/il paziente in merito alla gestione domiciliare
- Invio al Pronto Soccorso
- Invio ad ulteriore specialista
- Invio per ricovero
- Invio per visita alla clinica pediatrica
- Invio per indagini di laboratorio/indagini strumentali
- Utilizzo farmaci
- Aver richiesto attrezzature, pannolini, trasporti

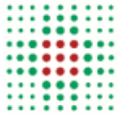

### Progetto SpeNK

“Il neonato e il bambino ad alta complessità assistenziale. L'implementazione e la valutazione delle dimissioni protette e dei percorsi integrati ospedale-territorio nella provincia di Bologna”

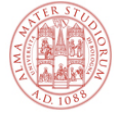

- Aver risolto questioni legate a dati mancanti, mancate comunicazioni, problemi burocratici
- Aver riesaminato dati laboratorio, resoconti degli specialisti, programmi di educazione individuale, ecc.
- Attività di sostegno per la famiglia/paziente
- Aver provveduto ai bisogni immediati, alle domande e alle preoccupazioni della famiglia
- Problemi non risolti
- Altro

#### NOTE

---

---

---

---

---

---

---

---

---

---

---

---

---

---

---

---

---

---

---

---

---

---

---

---

---

---

---

---

---
